# Supplementary material
Source: PubMed Central journal article supplement (PMC8893600)
Supplement: NIHMS1779480-supplement-Supplementary_information.pdf [file NIHMS1779480-supplement-Supplementary_information.pdf]

## Supplemental Material

This PDF file includes:

- 1. Supplementary Methods**
- 2. Supplementary Figures**
- 3. Supplementary Tables**

## **1. Supplementary Methods**

### **Patients and Samples**

Thirty patients with diabetes and biopsy-proven DN diagnosed at Peking University First Hospital, were enrolled in this study. Patients with other known kidney diseases were excluded. Routine clinical and pathological data of these patients were obtained. Kidney biopsy samples were collected to measure ANXA1 protein expression in kidneys. Urine and plasma samples were collected on the day of kidney biopsy for detecting urinary ANXA1 levels and plasma ANXA1 levels, accordingly. Control kidney samples (n=7) were obtained from the healthy kidney poles of individuals receiving tumor nephrectomies without diabetes or kidney diseases. We also collected urine and plasma samples from 18 DM patients without kidney injuries from the outpatient clinic of the Department of Endocrinology of our hospital. Urine and plasma samples of 10 age- and sex-matched healthy donors were collected. These healthy controls did not have a history of hypertension, diabetes, cardiovascular diseases, and kidney diseases.

Kidney biopsy samples from patients with DN (n=17) were obtained from the European Renal cDNA Bank (ERCB) for gene expression profiling.<sup>1</sup> The ERCB is a multicenter study established to collect kidney biopsy tissues for gene expression analysis at the time of a clinically indicated biopsy. Biopsies were obtained from patients after informed consent with approval of the local ethics committees. Tissue obtained from healthy living transplant donors (n=21) was used as the control group. Kidney tissues from ERCB were processed prior to transcriptional profiling as

previously described.<sup>2</sup> Collected kidney tissues were stored in RNAlater (ThermoFisher Scientific) and manually microdissected into glomerular and tubulointerstitial compartments. Tubulointerstitial transcriptional data were used to assess the reliability of microdissection, targeting 16-fold to 64-fold enrichment of tubulointerstitial-selective transcripts. RNA from each compartment was processed and analyzed using Affymetrix GeneChip Human Genome U133A and U133 Plus 2.0 platforms. Tubulointerstitial transcriptome data for patients from ERCB cohort have been deposited into GEO under the accession number, GSE104954.

Protocol biopsy specimens were collected from 69 American Indians with type 2 diabetes enrolled in Renoprotection in Early Diabetic Nephropathy in Pima Indians trial (Clinicaltrials.gov identifier NCT00340678).<sup>3</sup> The participants were followed annually for routine measurements of albuminuria and GFR. GFR was measured by the urinary clearance of iothalamate (iGFR).<sup>4</sup> Healthy tissues obtained from living transplant donors (n=18) were used as the control group. Owing to ethical considerations, privacy protection, and to avoid identifying individual study participants in this vulnerable population, the Institutional Review Board of the National Institute of Diabetes and Digestive and Kidney Diseases has stipulated that individual-level gene expression and genotype data from the Pima Indian study cannot be made publicly available.

### **Experimental Animals**

The DNA sequencing results showed a 10-base deletion of *Anx1* in heterozygous knockout (KO) mice (Supplementary Figure S1a). Total protein from

mice liver tissues was subjected to Western blot, and total RNAs from mice kidney tissues were subjected to quantitative PCR (qPCR) analysis. The results showed that ANXA1 expression was not detected in *Anxa1* KO mice (Supplementary Figure S1c and d).

To further test for a protective role of ANXA1, mice with transgenic overexpression of the *Anxa1* transgene (*Anxa1*-Tg) were generated. We performed agarose gel-electrophoresis on DNA isolated from wild type and transgenic animals. As demonstrated in Supplementary Figure S1b, *Anxa1* transgenic mice expressed a 461bp transgenic marker compared with WT mice. ANXA1 protein level was also overexpressed in *Anxa1*-Tg mice, demonstrated by Western blot and qPCR (Supplementary Figure S1c and e).

### **Animal Studies**

WT mice, *Anxa1* knockout mice and *Anxa1* transgenic mice were fed with a high-fat diet (HFD) (60% fat, HfkBio, China) for 1 month, followed by intraperitoneal injection of 50 mg/kg streptozotocin (STZ) (S0130; Sigma-Aldrich Corp.) for 5 days. Mice were maintained for 20 weeks of HFD feeding. Mice fed with a standard fat diet (SFD: 10% fat) were used as non-diabetic controls. In another set of experiments, WT and *Anxa1* KO mice were randomly assigned either SFD or HFD for 16 weeks.

For the treatment study in db/db mice, 10 weeks db/db mice were maintained on the Ac2-26 (0.5 mg/kg, 1 mg/kg, 2 mg/kg, in PBS) or vehicle (PBS) treatment for 10 weeks (every 48 hours, intraperitoneally). Age-matched db/m mice treated with



vehicle served as a non-diabetic control group. The Ac2-26 peptide was synthesized by GL Biochem (China) and the purity of Ac2-26 was 96.47%. For the treatment study in diabetic *Anxa1* KO mice, all four mice groups were induced DN with HFD/STZ as above described. After STZ injection, mice were maintained for 16 weeks of HFD feeding. At the same time, one group of diabetic *Anxa1* KO mice and one group of diabetic WT mice were maintained on the Ac2-26 treatment (2 mg/kg, in PBS) and the other 2 groups of mice were treated with vehicle (PBS) for 16 weeks (every 48 hours, intraperitoneally).

### **Blood and Urine Examination**

The concentration of urinary and plasma ANXA1 was measured using Human ANXA1 ELISA kit according to the manufacturer's instructions (ab222868; Abcam). Urine albumin concentration was measured using a kit from Bethyl Laboratories, Inc. (E99-134). Urine creatinine level was measured using Creatinine Companion kit (#1012; Exocell). The level of urine albumin was normalized to urine creatinine (uACR). Serum creatinine (Scr) and blood urea nitrogen (BUN) were measured by the automated biochemical analyzer (Beckman Coulter Inc.). Blood glucose, blood cholesterol and triglyceride levels were determined using commercial kits (#240, #180, #220; Biosino).

### **Glucose Tolerance Test (GTT) and Insulin Tolerance Test (ITT) Test**

After 16 weeks of feeding, HFD mice fasted overnight were intraperitoneally injected with glucose (1 g/kg) or insulin (0.5 units/kg) for the glucose tolerance tests and insulin tolerance tests. Blood was collected from the tail vein at 0, 15, 30, 60, 90,

and 120 min after injection. The blood glucose level was measured using commercial kits (Biosino).

### **Histological Analysis**

For kidney tissues of patients, the presence of sclerotic glomeruli was calculated as the percentage of the total number of glomeruli in the biopsy samples. Tubulointerstitial inflammation was scored semi-quantitatively, based on the percentage of the tubulointerstitial compartment affected (0: none, 1: <25%, 2: 25–50%, 3: > 50%).<sup>5</sup>

Twenty glomeruli per kidney section were analyzed under 400 magnification for mice kidney tissues. Glomerular area was measured by tracing around the perimeter of the glomerular tuft. Mesangial matrix expansion area was defined as the PAS-positive and nuclei-free area in the mesangium and expressed as a ratio to a total glomerular area. The positive staining signals were quantified using Image-Pro Plus (Media Cybernetics, Bethesda, MD). The tubulointerstitial injury index was assessed by evaluating the amount and severity of tubule dilation, atrophy, and loss of tubular cells. Twenty views of a kidney section were photographed (magnification, ×200) and scored with 0 for no injury, 1 for < 25%, 2 for 25%-50%, 3 for 50%-75%, and 4 for > 75% of the proportion with tubulointerstitial injury.<sup>6</sup> Histological analysis was performed in a blinded manner. For the evaluation of fibrosis, kidney tissues were stained with Sirius Red (G1470; Solarbio) in accordance with the manufacturer's protocols.

### **Immunohistochemistry and Immunofluorescence**

Paraffin-embedded kidney sections were stained with antibodies against  $\alpha$ -smooth muscle actin ( $\alpha$ -SMA) (ab32575; Abcam), and F4/80 (MCA497; Serotec). Immunofluorescence staining was performed using anti-ANXA1 (ab214486; Abcam), anti-podocalyxin (MAB1658; R&D Systems), anti-AQP-1 (sc-25287; Santa Cruz), anti-integrin  $\alpha$ 8 (sc-365798; Santa Cruz), anti-CD68 (ab955; Abcam), and anti-CD31 antibodies (sc-376764; Santa Cruz).

### **Transmission Electron Microscopy**

Briefly, kidney tissues for electron microscopy were fixed in 3% glutaraldehyde and 1% osmium tetroxide (OsO<sub>4</sub>), followed by dehydration in graded ethanol series and washed with acetone, and finally embedded in Epon 812. Ultrathin sections were stained with uranyl acetate and lead citrate. Sections were then examined with a transmission electron microscope (JEM-1230; JEOL, Japan). Image-Pro Plus was used to measure the GBM thickness, foot process width and endothelial fenestrations.<sup>7-9</sup> All glomeruli were selected from each mouse and fifteen electron micrographs were taken in each glomerulus.

### **Real-time quantitative Polymerase Chain Reaction (qPCR) analysis**

Total RNA was extracted from kidney tissues of HFD/STZ *Anxa1* KO mice and HFD/STZ WT mice. Mouse Inflammatory Cytokines and Receptors RT<sup>2</sup> Profiler PCR Array System were used (PAMM-011A; SABiosciences Corporation).

Total RNA was extracted from cultured cells or mouse kidney tissues. Real-time qPCR was performed using SYBR Green reagent (A25742; Applied Biosystems).

Relative gene expression was obtained after normalization with  $\beta$ -actin and followed by comparison with the control groups.

### **Flow Cytometry**

We sacrificed the mice and harvested the right kidneys. After washing in PBS, the kidneys were cut into pieces and ground with homogenizer until there was no visible massive tissue. Washed the tissue with PBS three times and centrifuged at 1000 rpm for 3 minutes. Filtered the tissue to remove residue and collected the single cell suspension. Diluted 100 $\mu$ l single cell suspension to 1ml with PBS and incubated with FITC-CD86/PE-CD206 antibody (Biolegend) for 30min at room temperature. Flow cytometry was performed using BD FACS Calibur.

### **Cell Culture and Treatment**

HK-2 cells were cultured in Dulbecco's modified Eagle medium/nutrient mixture F-12. One day before transfection, cells were plated and grown to ~50% confluence. HK-2 cells were transfected with siRNAs targeting human ANXA1 (HSS100503; Invitrogen) using X-tremeGENE siRNA Transfection Reagent (#4476093001; Roche Applied Science) according to the manufacturer's instructions. Scrambled siRNAs (#12935200; Invitrogen) were applied to parallel cultures as negative controls. When cell confluency reached to 80% confluence, cells were stimulated with high glucose and palmitic acid (HGPA; final concentration 30 mmol/l glucose and 300  $\mu$ mol/l of the saturated free fatty acid palmitate [16:0]) for 24 h then harvested.<sup>10</sup> The blank group (containing only the medium) was served as the normal control group. The

control group was served as the isotonic solvent control group using mannitol and endotoxin-free BSA.

To investigate the pro-resolution function of Ac2-26 in HK-2 cells, cells were stimulated with HGPA and treated with Ac2-26 (15  $\mu\text{mol/l}$ ) for 36 h. In addition, HK-2 cells were pretreated with WRW4 (10  $\mu\text{mol/l}$ ; MeilunBio), known to antagonize ALX/FPR2,<sup>11</sup> or Boc-MLF (1  $\mu\text{mol/l}$ ; MeilunBio), known to selectively antagonize FPR1, or Boc-MLF (10  $\mu\text{mol/l}$ ), as pan-FPR antagonist,<sup>12</sup> prior to Ac2-26 treatment.

### **Western Blot**

Total proteins were extracted from cultured HK-2 cells or mice kidney tissues using RIPA buffer (150 mM NaCl, 0.5% sodium deoxycholate, 0.1% SDS, 1% NP40, 1 mM EDTA and 50 mM Tris pH 8.0). Equal amounts of protein were separated by sodium dodecyl sulfate polyacrylamide gel electrophoresis. Then samples were transferred to PVDF membrane and incubated with the primary antibody in 5% milk. After blocking with 5% milk, the membranes were incubated with antibodies against NF- $\kappa$ B p65 (ab32536; Abcam), NF- $\kappa$ B p65 (phospho S536) (ab76302; Abcam), I $\kappa$ B $\alpha$  (#9242; Cell Signaling Technology), phospho-I $\kappa$ B $\alpha$  (#2859; Cell Signaling Technology), ANXA1 (ab214486; Abcam),  $\beta$ -actin (ab6276; Abcam), and GAPDH (ab181602; Abcam) and subsequently incubated with peroxidase-conjugated secondary antibodies (Proteintech). Proteins were visualized using the chemiluminescence substrate kit (Millipore). Target proteins were quantified using Image J software.

### **Co-immunoprecipitation (Co-IP)**

Co-IP was carried out using a Pierce Crosslink Magnetic Co-IP kit (#88805; ThermoFisher Scientific). Briefly, Cells or kidney tissues were lysed and the protein concentrations were measured. Then, 500 µg of protein in 500 µl of supernatant was incubated with 5 µg anti-p65, anti-ANXA1 or anti-IgG antibodies coated on beads on a rotator overnight at 4°C. The beads were washed to remove non-bound material and eluted in a low-pH elution buffer that could dissociate bound antigen from the antibody-crosslinked beads. The precipitate was separated by SDS-PAGE and detected by immunoblotting.

### **Electrophoretic Mobility Shift Assay (EMSA)**

The p65 double-stranded oligonucleotide probe was synthesized (5'-C A T C G G A A T T T C C G G A A T T T C C G G A A T T T C C G G C -3' / 5'-G C C G G A A T T T C C G G A A T T T C C G G A A T T T C C G A T G -3') and the 3' and 5' ends of p65 were labeled with biotin (Takara Bio Inc.).<sup>13</sup> Nuclear extracts were extracted using NE-PER Nuclear and Cytoplasmic Extraction kit (ThermoFisher Scientific) according to the manufacturer's instructions. The nuclear extract proteins (5 µg) and biotin-labeled p65 probes (20 fmol) were incubated together for 20 min at room temperature, followed by loading onto a native 4% polyacrylamide gels using 0.5×Tris-borate-EDTA. The gel was pre-run and run with 0.5% Tris-Borate-EDTA and processed according to the manufacturer's instructions. Competition experiments were done by co-incubation of a 200-fold excess (4 pmol) of unlabeled double-stranded oligonucleotide in the DNA-protein binding reaction. For supershift

analysis, 4 µg of anti-p65 antibody (Abcam) were pre-incubated for 30 min at room temperature before the binding reaction.

### **Surface Plasmon Resonance (SPR) Analysis**

The ligand, p65 (LifeSpan Bio., Seattle WA, USA), was immobilized onto a CM5 sensor chip surface (GE Healthcare). The carboxymethyl dextran surface of the CM5 sensor chip was first activated by a 6-min injection of a 1:1 mixture of 0.4 M N-ethyl-N-(3-diethylaminopropyl) carbodiimide and 0.1 M N-hydroxysuccinimide (NHS) at a flow rate of 10 µl/min. Then, a solution of p65 (50 ng/ml; LS-G79230-20; LifeSpan) in immobilization buffer (10 mM sodium acetate, pH 5.0; GE Healthcare) was fluxed over the reactive matrix at a flow rate of 10 µl/min, with the NHS esters of the substrate spontaneously reacting with the protein amines to form covalent links. SPR measurements were performed by using multicycle kinetics which consists of injections of increasing concentrations of the analyte over a functionalized sensor chip surface. Solutions of ANXA1 (#3770-AN-050; R&D Systems) or Ac2-26 of 5 different concentration was made by PBS containing 0.05%(v/v) Tween 20 and ANXA1 protein or Ac2-26 peptide. The solutions were fluxed over the sensor chip surface for 120 s by using a flow rate of 30 µl/min. The binding assay also included three start-up cycles using buffer to equilibrate the surface, as well as a zero concentration cycle of analyte in order to have a blank response usable for double reference subtraction. The data was analyzed using the Bia Evaluation 4.1 software with a simple 1:1 langmuir binding model.

### **Statistical Analysis**

The continuous data were expressed as mean  $\pm$  s.d., or median and interquartile range (IQR). Categorical data were described by absolute frequencies and percentages. For clinical data, student's *t*-test or Mann-Whitney U test was used as appropriate to compare independent continuous variables. Differences of qualitative results were compared using chi-square test. Correlations between ANXA1 and clinical-pathological parameters were determined by Pearson or Spearman analysis. Cumulative kidney survival curves were generated using the Kaplan-Meier method and compared using the log-rank test. Murine *in vivo* experiments were performed with a group size of n = 5-6. A student's *t*-test was used for a single comparison. For multiple comparisons, data were analyzed by one- or two-way ANOVA as appropriate, with post hoc comparison using Tukey's test. For *in vitro* experiments, at least 3 independent experiments were performed, and statistical significance was determined using Student's *t*-test or two-way ANOVA followed by Turkey's test as appropriate. Analyses were performed with SPSS statistical software package (SPSS 24.0; IBM Corp., Armonk, NY).

## References

1. Lindenmeyer MT, Kretzler M, Boucherot A, et al, Interstitial vascular rarefaction and reduced VEGF-A expression in human diabetic nephropathy. *J Am Soc Nephrol.* 2007;18:1765-1776.
2. Cohen CD, Frach K, Schlöndorff D, et al. Quantitative gene expression analysis in renal biopsies: a novel protocol for a high-throughput multicenter application. *Kidney Int.* 2002;61:133-140.
3. Weil EJ, Fufaa G, Jones LI, et al. Effect of losartan on prevention and progression of early diabetic nephropathy in American Indians with type 2 diabetes. *Diabetes.* 2013;62:3224-3231.
4. Myers BD, Nelson RG, Tan M, et al. Progression of overt nephropathy in non-insulin-dependent diabetes. *Kidney Int.* 1995;47:1781-1789.



5. Wu WY, Zhou XJ, Sun PP, et al. Interstitial eosinophilic infiltration in diabetic nephropathy is indicative of poor prognosis, with no therapy benefit from steroid. *J Diabetes*. 2020;12:881-894.
6. Chai Z, Dai A, Tu Y, et al. Genetic deletion of cell division autoantigen 1 retards diabetes-associated renal injury. *J Am Soc Nephrol*. 2013;24:1782-1792.
7. Jensen EB, Gundersen HJ, Osterby R. Determination of membrane thickness distribution from orthogonal intercepts. *J Microsc*. 2012;115:19-33.
8. Gundersen HJ, Seefeldt T, Osterby R. Glomerular epithelial foot processes in normal man and rats. Distribution of true width and its intra- and inter-individual variation. *Cell Tissue Res*. 1980;205:147-155.
9. Inai T, Mancuso M, Hashizume H, et al. Inhibition of vascular endothelial growth factor (VEGF) signaling in cancer causes loss of endothelial fenestrations, regression of tumor vessels, and appearance of basement membrane ghosts. *Am J Pathol*. 2004;165:35-52.
10. Declèves AE, Zolkipli Z, Satriano J, et al. Regulation of lipid accumulation by AMP-activated kinase [corrected] in high fat diet-induced kidney injury. *Kidney Int*. 2014;85:611-623.
11. Senchenkova EY, Ansari J, Becker F, et al. Novel role for the AnxA1-Fpr2/ALX signaling axis as a key regulator of platelet function to promote resolution of inflammation. *Circulation*. 2019;140:319-335.
12. Stenfeldt AL, Karlsson J, Wennerås C, Bylund J, Fu H, Dahlgren C. Cyclosporin H, Boc-MLF and Boc-FLFLF are antagonists that preferentially inhibit activity triggered through the formyl peptide receptor. *Inflammation*. 2007;30:224-229.
13. Zhang Z, Huang L, Zhao W, et al. Annexin 1 induced by anti-inflammatory drugs binds to NF-kappaB and inhibits its activation: anticancer effects in vitro and in vivo. *Cancer Res*. 2010;70:2379-2388.

## 2. Supplementary Figures

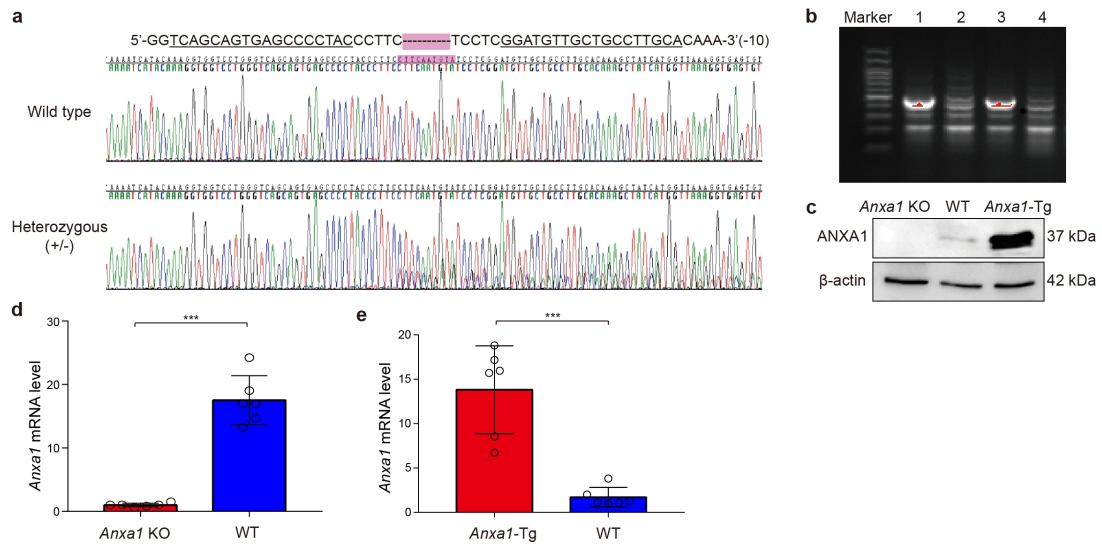

**Figure S1. Identification of Annexin A1 (*Anxa1*) knockout mice and *Anxa1* transgenic mice.**

(a) The DNA sequencing results of WT mice (up) and *Anxa1* knockout heterozygote mice (below). The double peak showed a 10 bases deletion (CTTCAATGTA) in one strand. (b) The agarose gel electrophoresis of *Anxa1* transgenic mice (the first and third lines) and WT mice (the second and fourth lines). The positive transgenic marker is 461 base pairs. (c) Western blot demonstrated ANXA1 expression was not detected in *Anxa1* KO mice, and overexpressed in *Anxa1* transgenic mice. (d) RT-qPCR analysis showing *Anxa1* mRNA levels in kidneys in SFD *Anxa1* KO and SFD WT mice.  $n = 6$ . (e) RT-qPCR analysis showing *Anxa1* mRNA levels in kidneys in SFD *Anxa1*-Tg mice and SFD WT mice.  $n = 6$ . \* $P < 0.05$ , \*\* $P < 0.01$ , and \*\*\* $P < 0.001$  determined by Student  $t$  test. *Anxa1*-Tg, *Anxa1* transgenic; KO, knockout; SFD, standard fat diet; WT, wild type.

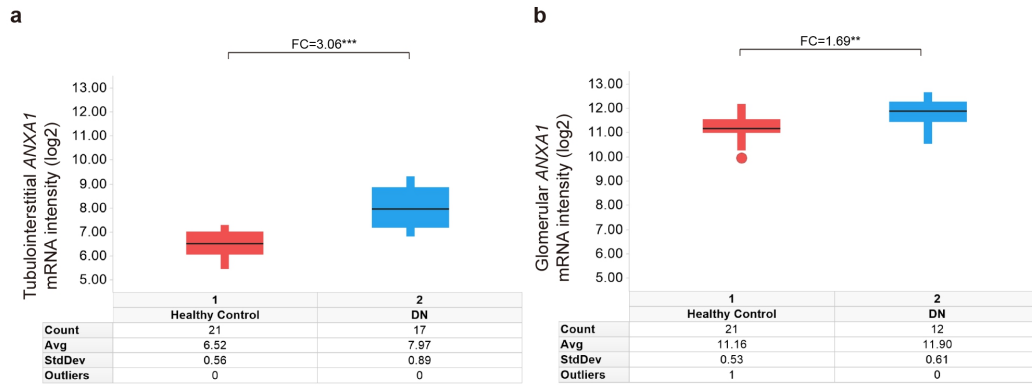

**Figure S2. Annexin A1 (*ANXA1*) mRNA in kidney biopsies from patients with diabetic nephropathy (DN).**

(a) *ANXA1* mRNA (log<sub>2</sub>) levels in the tubulointerstitial compartment in advanced DN patient's samples from ERCB (n = 17) and healthy controls (n = 21). (b) *ANXA1* mRNA (log<sub>2</sub>) levels in the glomerular compartment in advanced DN patient's samples from ERCB (n = 12, who had glomerular data among 17 DN patients) and healthy controls (n = 21). \**P* < 0.05, \*\**P* < 0.01, and \*\*\**P* < 0.001. FC, fold change; HC, healthy controls.

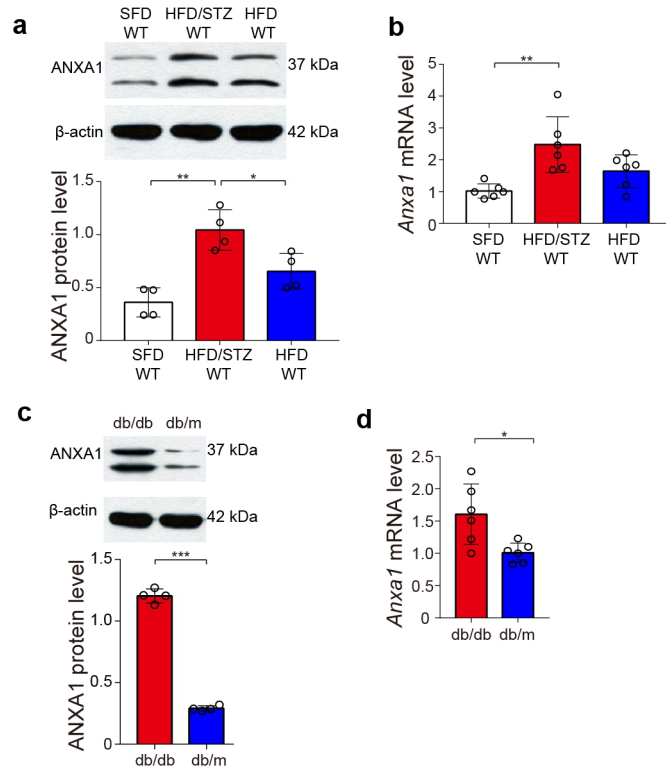

**Figure S3. Western blot and RT-qPCR were used to detect the expression of ANXA1 in experimental animals.**

(a) Western blot and (b) RT-qPCR analyzing the ANXA1 levels in kidneys of SFD WT mice (left), HFD/STZ WT mice (mid), and HFD WT mice (right). (c) Western blot and (d) RT-qPCR analyzing the ANXA1 levels in kidneys of db/db mice (left) and db/m mice (right). Data analyses were performed by Student *t* test for 2 groups and 1-way ANOVA followed by a Tukey test for 3 groups. Data expressed as mean ± SD. \* $P < 0.05$ , \*\* $P < 0.01$ , and \*\*\* $P < 0.001$ .

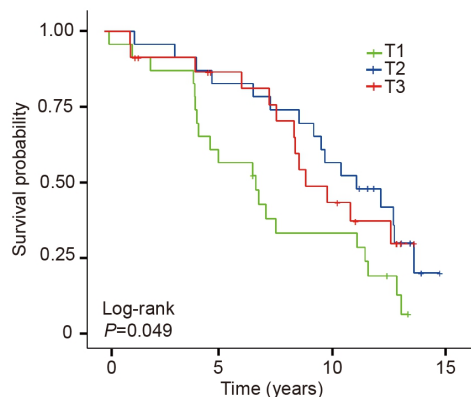

**Figure S4. *ANXA1* mRNA levels associated with kidney outcomes.**

According to tertiles, Kaplan-Meier survival curves depicting kidney survival in low (T1), medium (T2), and high (T3) *ANXA1* mRNA groups (log-rank test) in the Pima Indians cohort during a follow-up of  $9.0 \pm 4.0$  years.

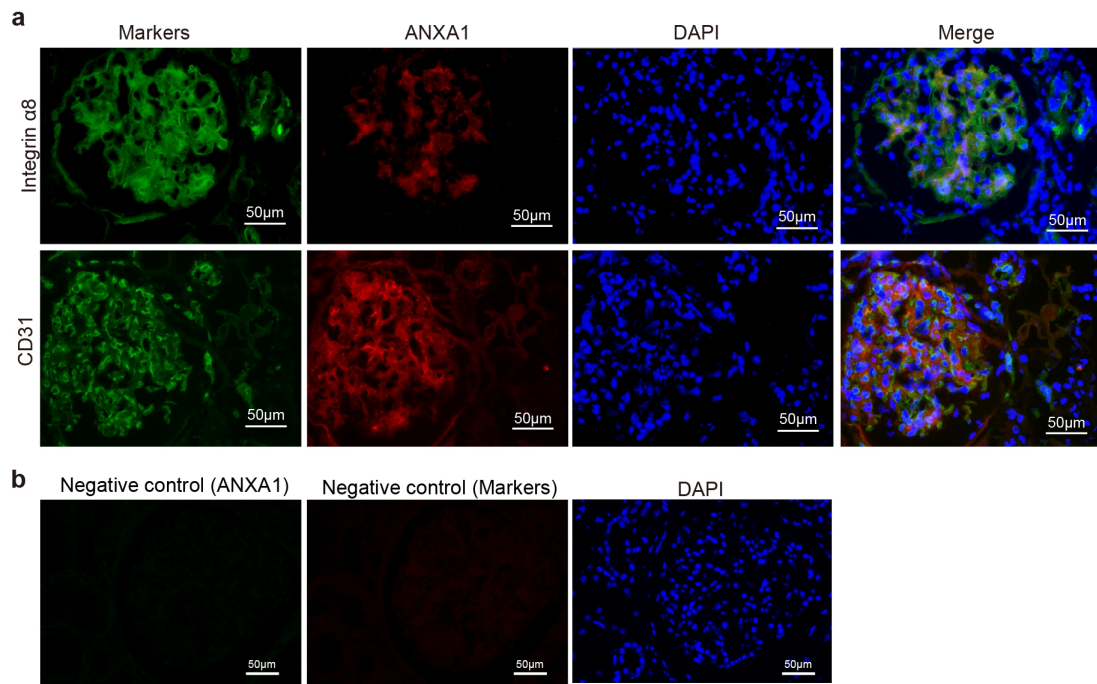

**Figure S5. Immunofluorescence colocalization analyses.**

(a) Representative fluorescent images showed the expression of ANXA1 in mesangial cells (integrin  $\alpha 8$ ) and endothelial cells (CD31) in the kidneys from DN patients. (b) For colocalization experiments, the negative control without primary antibody was used and no background fluorescence was observed. Bar = 50  $\mu\text{m}$ .

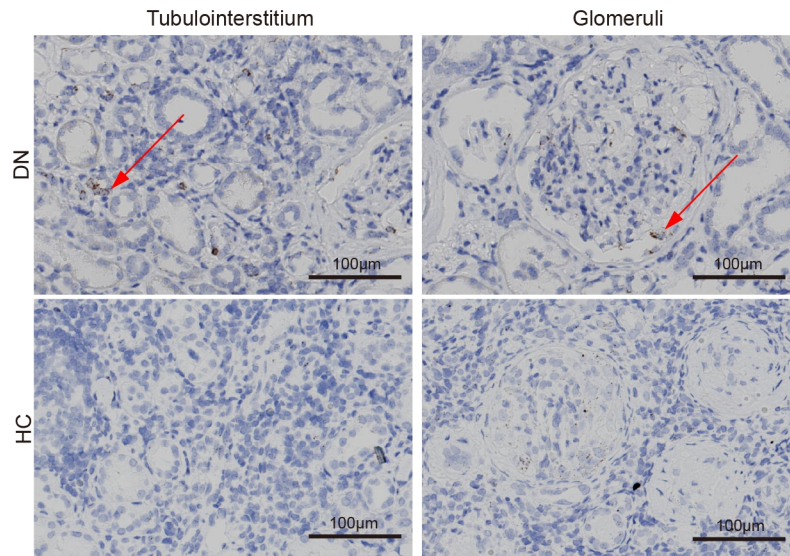

**Figure S6. *In situ* hybridization (ISH) analyses were performed to detect the source of ANXA1.**

(Top) ISH showed that ANXA1 was mainly expressed in parietal epithelial cells and tubular epithelial cells in kidneys from DN patients (red arrow). (Bottom) There was only a minor amount of ANXA1 expression in kidneys from healthy controls (HCs). Bar = 100 µm.

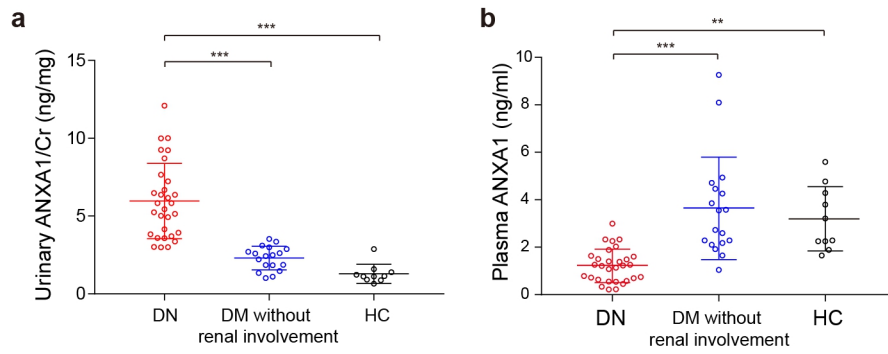

**Figure S7. Urine and plasma levels of ANXA1 in patients with DN.**

(a) The level of urinary ANXA1/Cr in DN patients was significantly higher than that in DM patients without kidney involvement and healthy controls. (b) The level of plasma ANXA1 in DN patients was significantly lower than that in DM patients without kidney involvement and healthy controls. Data analyses were performed by 1-way ANOVA followed by a Tukey test for 3 groups and expressed as mean  $\pm$  SD. \* $P < 0.05$ , \*\* $P < 0.01$ , and \*\*\* $P < 0.001$ .



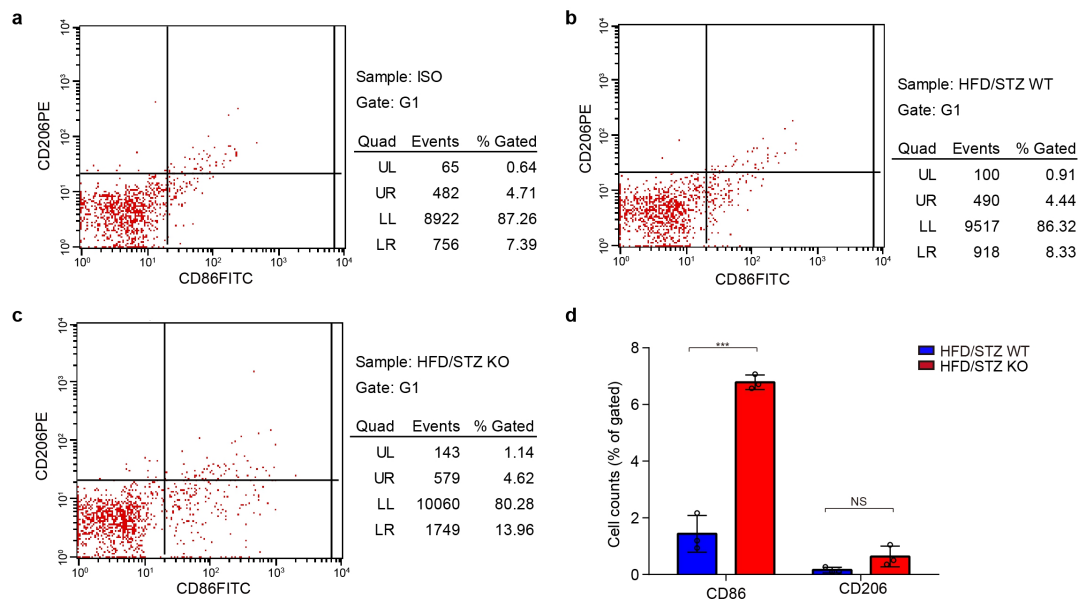

**Figure S8. Flow cytometry testing M1 and M2 macrophages in HFD/STZ *Anx1* KO mice and HFD/STZ WT mice.**

Representative flow cytometry results of (a) isotype control (ISO), (b) HFD/STZ WT mice and (c) HFD/STZ *Anx1* KO mice. (d) Statistical data for flow cytometry results. Data analyses were performed by Student *t* test. \*\*\* $P < 0.001$ .

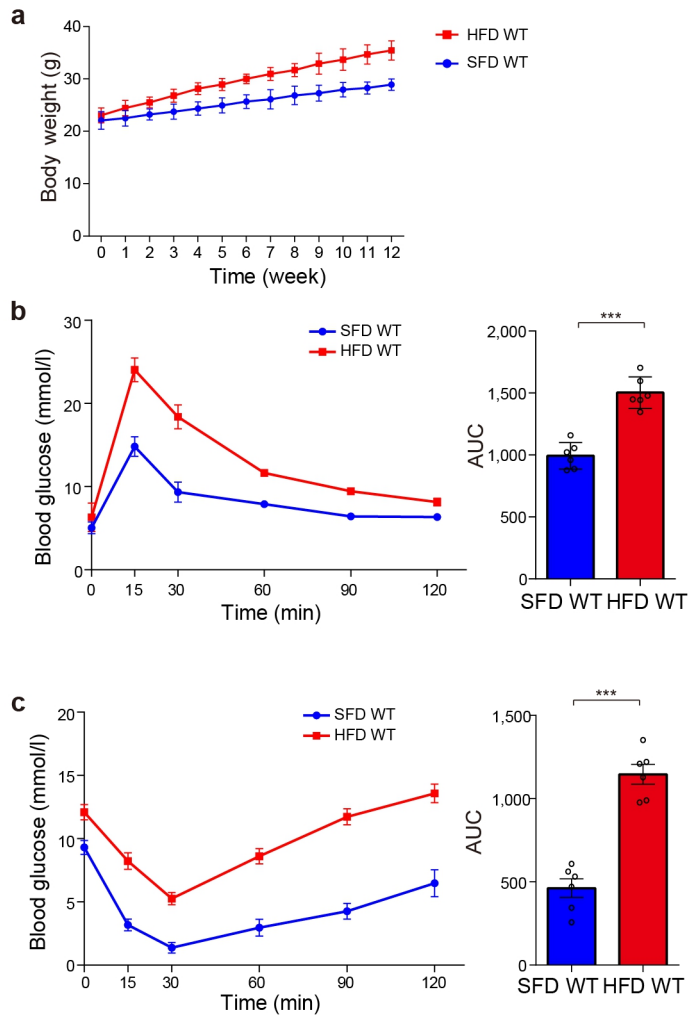

**Figure S9. HFD-induced diabetic mice had impaired glucose tolerance and insulin tolerance.**

(a) Body weight in SFD WT mice and HFD WT mice ( $n = 6$ ). (b) Glucose tolerance in SFD WT mice and HFD WT mice ( $n = 6$ ). (c) Insulin tolerance in WT mice and HFD mice ( $n = 6$ ).  $*P < 0.05$ ,  $**P < 0.01$ , and  $***P < 0.001$  determined by Student  $t$  test. HFD, high fat diet; SFD, standard fat diet.

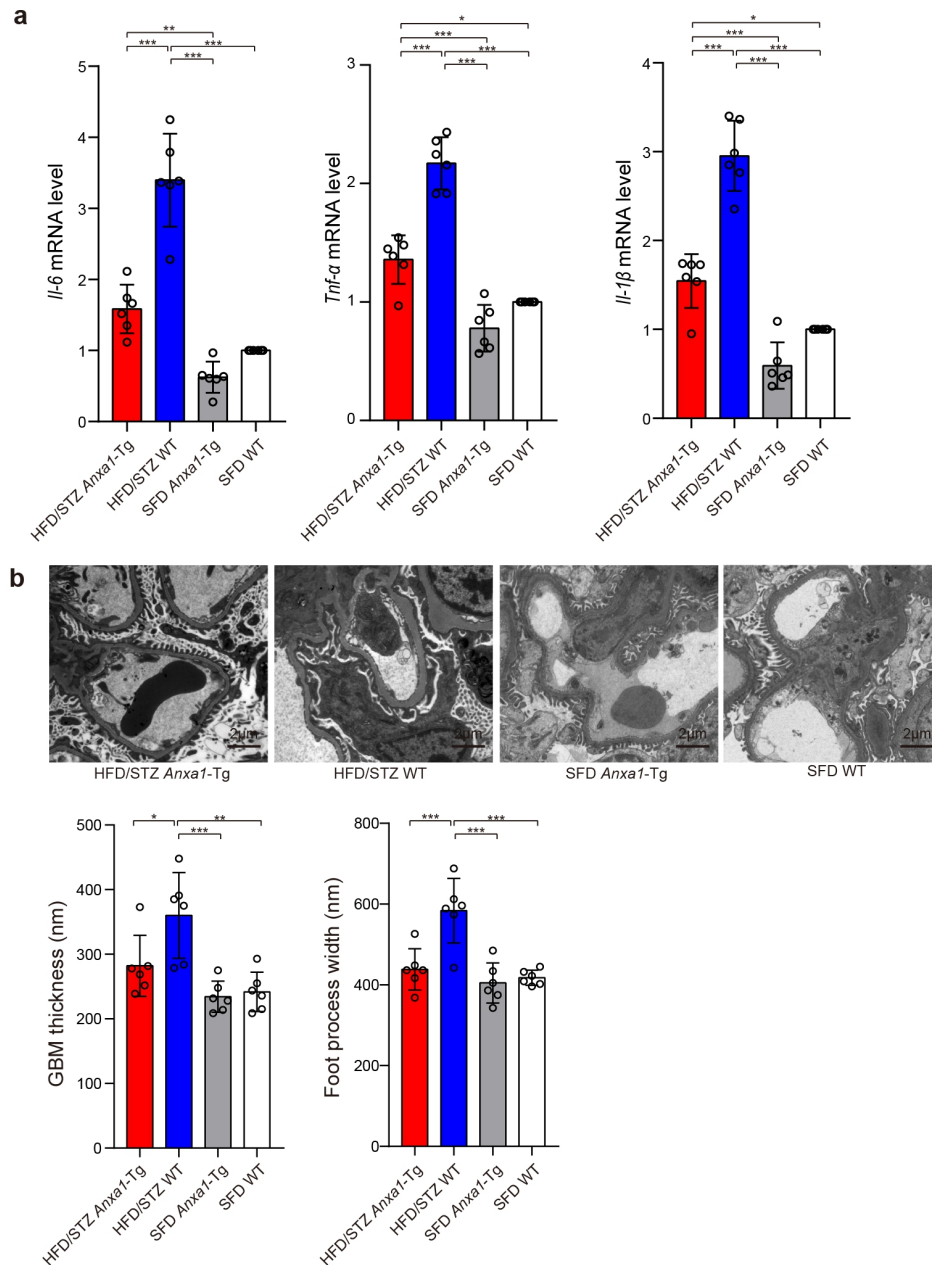

**Figure S10. Overexpression of ANXA1 reduced the expression of inflammatory factors.**

(a) RT-qPCR analyzed the mRNA expression level of interleukin-6 (*Il-6*), tumor necrosis factor- $\alpha$  (*Tnf- $\alpha$* ) and interleukin-1 $\beta$  (*Il-1 $\beta$* ) in *Anxa1-Tg* mice and WT mice (n = 6 per group) (b) Representative transmission electron microscopy images from WT and *Anxa1-Tg* mice. Bar = 2  $\mu$ m. Quantification of mean foot process width and quantification of mean glomerular basement membrane (GBM) thickness. \* $P < 0.05$ , \*\* $P < 0.01$ , and \*\*\* $P < 0.001$  determined by 2-way ANOVA followed by Tukey test. *Anxa1-Tg*, *Anxa1* transgenic; SFD, standard fat diet.

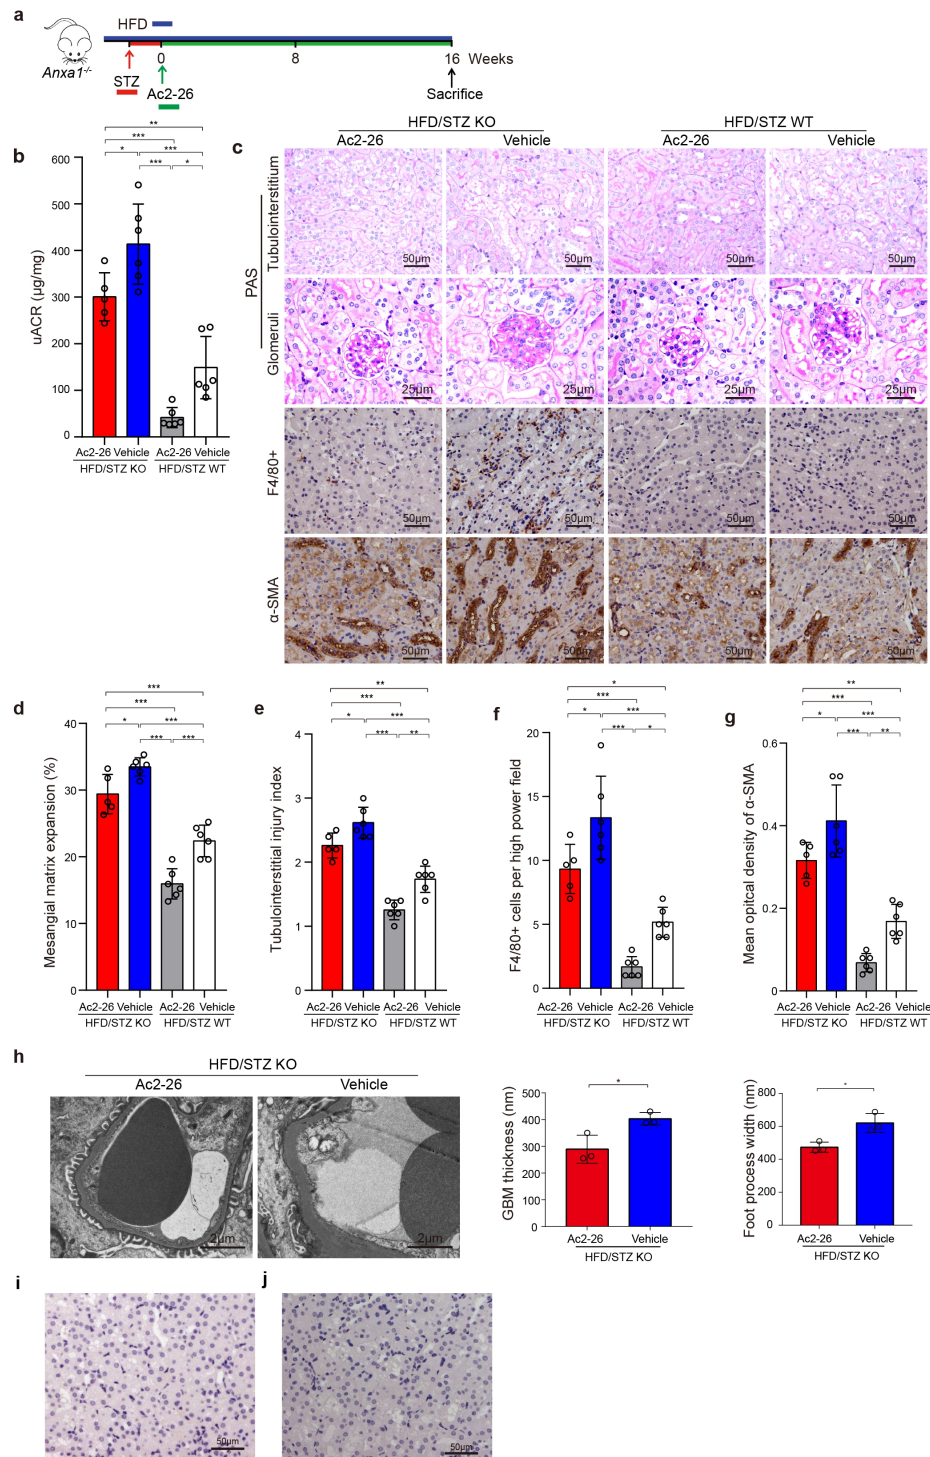

**Figure S11. Ac2-26 administration ameliorated inflammation in diabetic *Anxa1* KO mice.**

(a) Study design overview. Eight-week-old *Anxa1* KO mice were fed with a high-fat diet for 1 month, followed by i.p. injection of 50 mg/kg STZ for 5 days. After STZ injection, mice were maintained for 16 weeks of HFD feeding with Ac2-26 treatment or with vehicle (PBS) before sacrifice. n = 5 to 6 per group. (b) Four groups were evaluated for urine albumin-to-creatinine ratio (uACR). (c) Representative photomicrographs of periodic acid-Schiff (PAS) staining (bar = 50 µm for

tubulointerstitium and bar = 25  $\mu\text{m}$  for glomeruli), F4/80 staining (bar = 50  $\mu\text{m}$ ), and  $\alpha$ -SMA (bar = 50  $\mu\text{m}$ ). **(d)** Quantification of mesangial matrix expansion. **(e)** Quantification of tubulointerstitial injury index. **(f)** Quantitative analysis of F4/80 staining. **(g)** Quantitative analysis of  $\alpha$ -SMA expression. **(h)** Representative transmission electron microscopy (TEM) images in kidney cortex tissues isolated from diabetic *Anxa1* KO mice with and without Ac2-26 treatment. Quantification of mean glomerular basement membrane (GBM) thickness, and mean foot process width in 2 groups (n = 3). Bar = 2  $\mu\text{m}$ . **(i)** Immunohistochemical staining for F4/80 with the negative control in kidney tissues from HFD/STZ-induced diabetic mice. **(j)** Immunohistochemical staining for  $\alpha$ -SMA with the negative control in kidney tissues from HFD/STZ-induced diabetic mice. Throughout, data analyses were performed by Student *t* test for 2 groups and 2-way ANOVA followed by a Tukey test for 4 groups. Data expressed as mean  $\pm$  SD. \**P* < 0.05, \*\**P* < 0.01, and \*\*\**P* < 0.001. KO, knockout; WT, wild type.

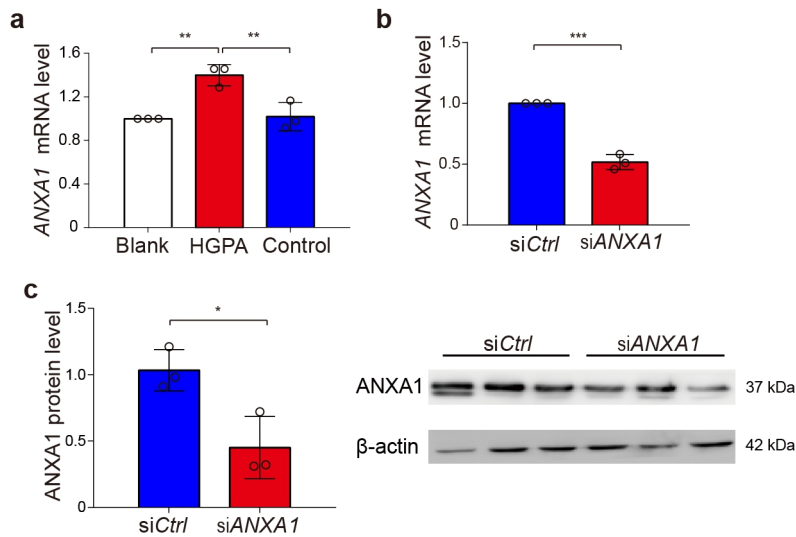

**Figure S12. RT-qPCR and Western blot were used to detect the expression of ANXA1 in HK-2 cells.**

(a) *ANXA1* mRNA levels were analyzed by RT-qPCR in HK-2 cells with HGPA treatment (n = 3). (b) RT-qPCR and (c) Western blot analyzing the expression level of ANXA1 in HK-2 cells (n = 3). The blank group was served as a normal control group. Mannitol and endotoxin-free BSA served as an isotonic solvent control group. Data analyses were performed by Student *t* test for 2 groups and 1-way ANOVA followed by a Tukey test for multiple groups. \**P* < 0.05, \*\**P* < 0.01, and \*\*\**P* < 0.001. HGPA, high glucose plus palmitic acid; siANXA1, siRNA against ANXA1; siCtrl, negative control siRNA.

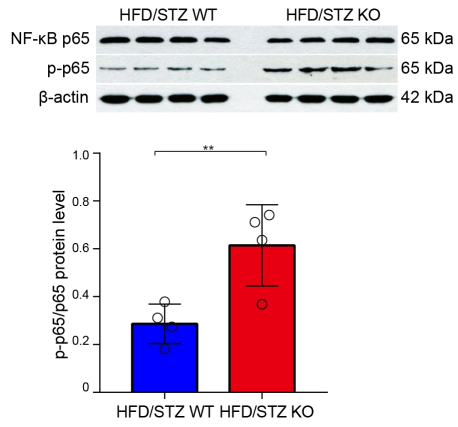

**Figure S13. The phosphorylation levels of NF-κB p65.**

Representative Western blot images and the analyses of phosphorylated p65 and p65 in HFD/STZ WT mice and HFD/STZ *Anx1* KO mice. \*\* $P < 0.01$ , determined by Student *t* test.

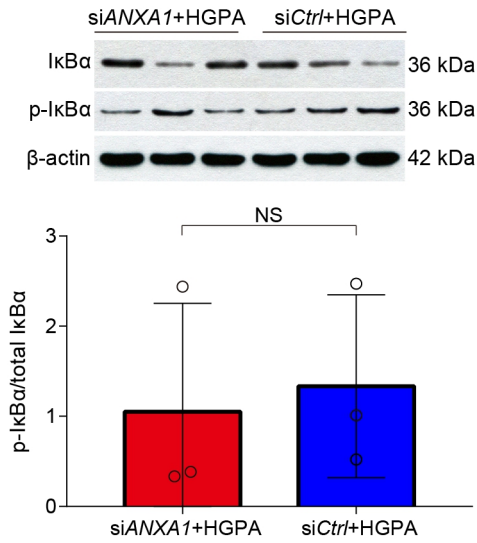

**Figure S14. The degradation of IκBα in siANXA1 group treated with HGPA.** Western blot showed that the phosphorylation levels of IκBα were not significantly altered in siANXA1 group treated with HGPA compared with siCtrl group treated with HGPA (by Student *t* test). HGPA, high glucose plus palmitic acid; NS, no significance; siANXA1, siRNA against ANXA1; siCtrl, negative control siRNA.



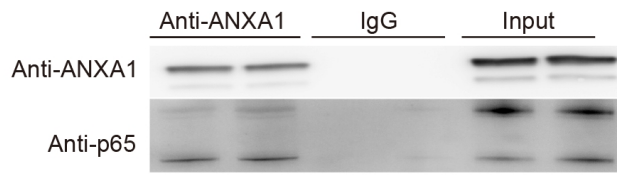

**Figure S15. Coimmunoprecipitation of ANXA1 and p65 in kidney tissues.**

Total protein lysates of kidney tissues from HFD/STZ WT mice were immunoprecipitated using an antibody against ANXA1 and immunoblotting against the p65.

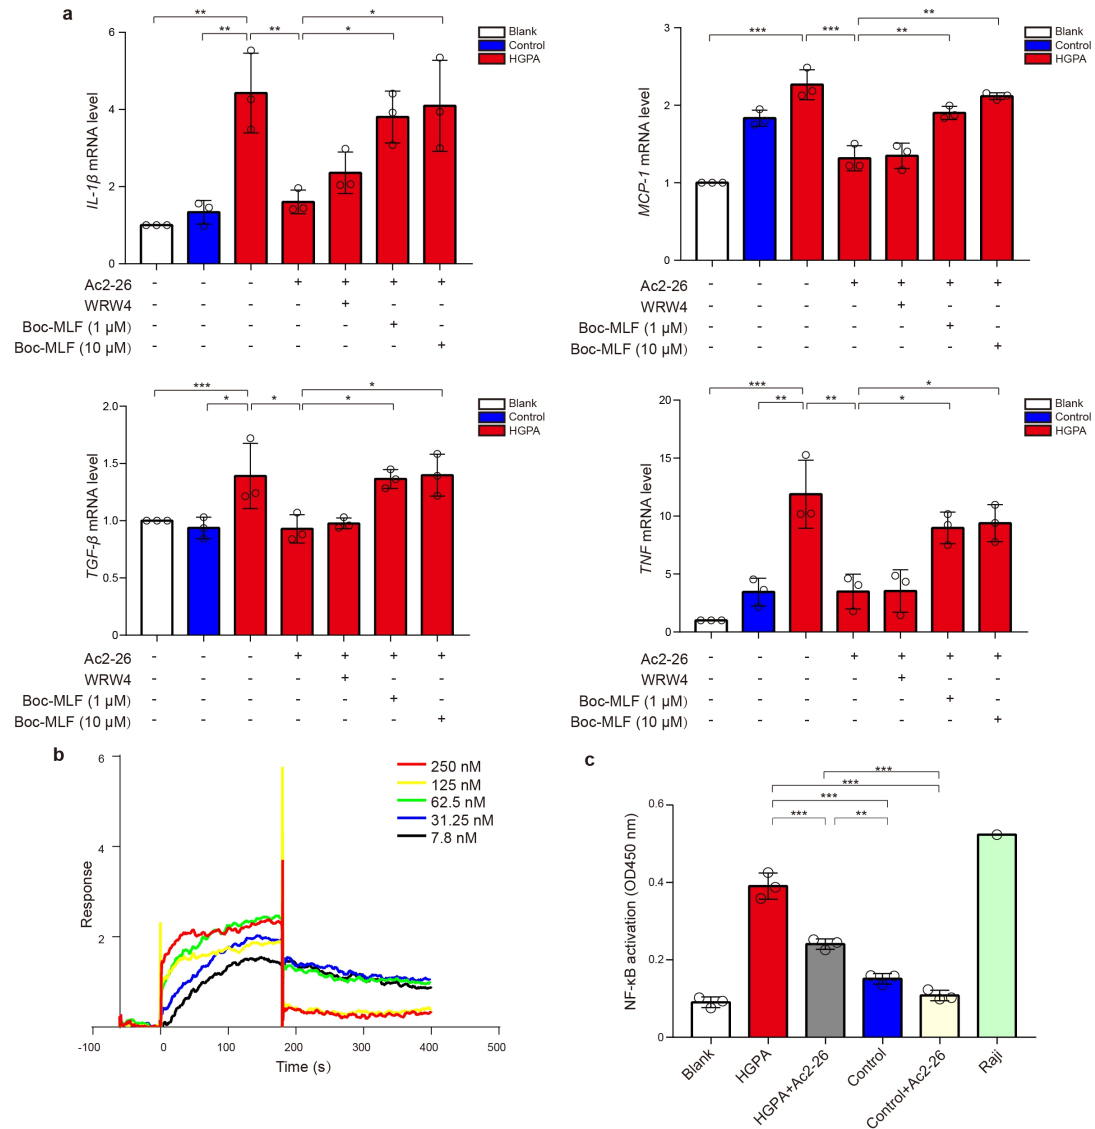

**Figure S16. Ac2-26 played the pro-resolving role via FPR1 in HK-2 cells.**

(a) The mRNA expression level of *IL-1 $\beta$* , *MCP-1*, *TGF- $\beta$*  and *TNF* in HK-2 cells treated with Ac2-26, WRW4, Boc-MLF(1  $\mu$ mol/L) and Boc-MLF(10  $\mu$ mol/L) by RT-qPCR. (b) The SPR response curves generated from Ac2-26 binding to p65. The results suggested that Ac2-26 did not interact with p65 directly. (c) The activation of NF- $\kappa$ B in HK-2 cells treated with different conditions. Data analyses were performed by 1 or 2-way ANOVA followed by a Tukey test and expressed as mean  $\pm$  SD.\* $P$  < 0.05, \*\* $P$  < 0.01, and \*\*\* $P$  < 0.001.

### 3. Supplementary Tables

**Table S1. Primer sequences used in real-time PCR analysis.**

| Gene                     | Primer Sequence 5' to 3'       |                                 |
|--------------------------|--------------------------------|---------------------------------|
|                          | Forward                        | Reverse                         |
| Human_<br>ANXA1          | 5'-GCAGGAATATGTTCAAACCTGTG     | 5'-CCTTATGCAAGGCAGCGA           |
| Human_<br>IL-1 $\beta$   | 5'-CCTGTCCTGCGTGTTGAAAGA       | 5'-GGGAACTGGGCAGACTCAAA         |
| Human_<br>TGF- $\beta$   | 5'-GCGCATCCTAGACCCTTTCTC       | 5'-CAGAAGGTGGGTGGTCTTGAA        |
| Human_<br>TNF            | 5'-CCCAGGCAGTCAGATCATCTTC      | 5'-GCTGCCCTCAGCTTGAG            |
| Human_<br>$\beta$ -actin | 5'-GAAGTGTGACGTGGACATCC        | 5'-CCGATCCACACGGAGTACTT         |
| Human_<br>GAPDH          | 5'-GAAGGTGAAGGTCGGAGTC         | 5'-GAAGATGGTGATGGGATTTC         |
| Mouse_<br>18S            | 5'-GTAACCCGTTGAACCCATT         | 5'-CCATCCAATCGGTAGTAGCG         |
| Mouse_<br>$\beta$ -actin | 5'-GTGACGTTGACATCCGTAAAGA      | 5'-GTAACAGTCCGCCTAGAAGCA<br>C   |
| Mouse_<br>Mcp-1          | 5'-AGAGCCAGACGGGAGGAAG         | 5'-CCAGCCTACTCATTGGGATC         |
| Mouse_<br>Il-10          | 5'-TGAATTCCTGGGTGAGAAG         | 5'-TCACTCTTCACCTGCTCCACT        |
| Mouse_<br>Il-1 $\alpha$  | 5'-CGAAGACTACAGTTCTGCCATT      | 5'-GACGTTTCAGAGGTTCTCAGA<br>G   |
| Mouse_<br>Il-1 $\beta$   | 5'-CGCAGCAGCACATCAACAAGAG<br>C | 5'-TGTCCTCATCCTGGAAGGTCC<br>ACG |
| Mouse_<br>Tnf- $\alpha$  | 5'-TGTCTACTCCCAGGTTCTCT        | 5'-GGGGCAGGGGCTCTTGAC           |
| Mouse_<br>Il-6           | 5'-TTCCATCCAGTTGCCTTCTT        | 5'-ATTTCCACGATTTCCCAGAG         |
| Mouse_<br>Anxa1          | 5'-CCTCATCTTCGCAGAGTGTTTC      | 5'-ACGATGGTTGTGAGGCACTTC<br>T   |

**Table S2.** General data of patients from China for measuring intrarenal ANXA1 expression.

| Parameters                                      | DN                      | HC            |
|-------------------------------------------------|-------------------------|---------------|
| Number of patients                              | 30                      | 7             |
| Age, years (mean±s.d.)                          | 51.23±9.75              | 52.29 ± 15.85 |
| Sex, M/F                                        | 22/8                    | 5/2           |
| Diabetes history, years (median, IQR)           | 10 (8, 15)              | -             |
| Type of diabetes, type 1/2                      | (0/30)                  | -             |
| Scr, µmol/l (median, IQR)                       | 181.98 (121.78, 387.17) | -             |
| BUN, mmol/l (median, IQR)                       | 27.17 (16.67, 32.30)    | -             |
| eGFR, ml/min/1.73m <sup>2</sup> (mean±s.d.)     | 38.07±26.81             | -             |
| Urinary protein, g/24h (mean±s.d.)              | 5.57±3.72               | -             |
| Fasting glucose, mmol/l (median, IQR)           | 7.27 (6.34, 12.27)      | -             |
| HbA1c, % (median, IQR)                          | 7.25 (5.78, 8.35)       | -             |
| Total cholesterol, mmol/l (mean±s.d.)           | 5.21±2.28               | -             |
| Triglycerides, mmol/l (median, IQR)             | 1.99 (1.33, 3.37)       | -             |
| HDL-C, mmol/l (mean±s.d.)                       | 1.05±0.31               | -             |
| LDL-C, mmol/l (mean±s.d.)                       | 3.07±1.33               | -             |
| Glomerulosclerosis, % (mean±s.d.)               | 32.19±24.78             | -             |
| Tubulointerstitial lesions                      |                         |               |
| Tubulointerstitial inflammation, -/+ /+++ /++++ | 0/2/7/21                | -             |
| IFTA score, grade 0/1/2/3                       | 0/3/7/20                | -             |

**[Abbreviations]** BUN, blood urea nitrogen; DN, diabetic nephropathy; eGFR, estimated glomerular filtration rate; HbA1c, hemoglobin A1c; HC, healthy controls; HDL-C, high-density lipoprotein cholesterol; IFTA, interstitial fibrosis and tubular atrophy; IQR, interquartile range; LDL-C, low-density lipoprotein cholesterol; Scr, serum creatinine; s.d. standard deviation.

**Table S3.** General data of patients from European Renal cDNA Bank with late DN for measuring intrarenal *ANXA1* mRNA expression.

| Parameters                                      | Living donors | DN          | <i>P</i> value |
|-------------------------------------------------|---------------|-------------|----------------|
| Number of samples                               | 21            | 17          | -              |
| Age, years (mean±s.d.)                          | 47.45±11.74   | 58.30±10.71 | <0.010         |
| Sex, M/F                                        | 11/10         | 12/5        | 0.253          |
| eGFR, ml/min/1.73 m <sup>2</sup><br>(mean±s.d.) | 104.66±31.33  | 44.31±24.90 | <0.001         |

**[Abbreviations]** DN, diabetic nephropathy; eGFR, estimated glomerular filtration rate; s.d. standard deviation; - not available.

**Table S4.** General data of American Indians with early DN for measuring intrarenal *ANXA1* mRNA expression.

| Parameters                                     | Living donors | DN          | <i>P</i> value |
|------------------------------------------------|---------------|-------------|----------------|
| Number of samples                              | 18            | 69          | -              |
| Age, years (mean±s.d.)                         | 47±13         | 45±10       | 0.632          |
| Sex, M/F                                       | 9/9           | 18/51       | 0.050          |
| HbA1c, % (median, IQR)                         | -             | 9 (8, 11)   | -              |
| uACR, mg/g (median, IQR)                       | -             | 31 (9, 157) | -              |
| iGFR, ml/min (mean±s.d.)                       | 108±32        | 146±52      | 0.005          |
| Diabetes duration at biopsy, years (mean±s.d.) | -             | 16±6        | -              |

**[Abbreviations]** iGFR, glomerular filtration rate was measured by the urinary clearance of iothalamate; IQR, interquartile range; uACR, urine albumin to creatinine ratio; s.d. standard deviation, - not available.

**Table S5.** General data of patients for measuring urinary and circulating ANXA1 levels.

| Parameters                                      | DN                      | DM without kidney involvement | HC          |
|-------------------------------------------------|-------------------------|-------------------------------|-------------|
| Number of patients                              | 30                      | 18                            | 10          |
| Age, years (mean±s.d.)                          | 51.23±9.75              | 44.56±9.88                    | 44.50±18.70 |
| Sex, M/F                                        | 22/8                    | 15/3                          | 8/2         |
| Diabetes history, years (median, IQR)           | 10 (8, 15)              | -                             | -           |
| Type of diabetes, type 1/2                      | (0/30)                  | (0/18)                        | -           |
| Scr, µmol/l (median, IQR)                       | 181.98 (121.78, 387.17) | 57.60 (45.10, 64.25)          | -           |
| BUN, mmol/l (median, IQR)                       | 27.17 (16.67, 32.30)    | -                             | -           |
| eGFR, ml/min/1.73m <sup>2</sup> (mean±s.d.)     | 38.07±26.81             | 182.72±48.31                  | -           |
| Urinary protein, g/24h (mean±s.d.)              | 5.57±3.72               | -                             | -           |
| uACR mg/g (mean±s.d.)                           | -                       | 5.31±1.55                     | -           |
| Fasting glucose, mmol/l (median, IQR)           | 7.27 (6.34, 12.27)      | 9.90±4.13                     | -           |
| HbA1c, % (median, IQR)                          | 7.25 (5.78, 8.35)       | 6.65 (5.98, 9.35)             | -           |
| Total cholesterol, mmol/l (mean±s.d.)           | 5.21±2.28               | 5.46±1.34                     | -           |
| Triglycerides, mmol/l (median, IQR)             | 1.99 (1.33, 3.37)       | 1.38 (0.87, 1.91)             | -           |
| HDL-C, mmol/l (mean±s.d.)                       | 1.05±0.31               | 1.45±0.41                     | -           |
| LDL-C, mmol/l (mean±s.d.)                       | 3.07±1.33               | 3.04±1.17                     | -           |
| Glomerulosclerosis, % (mean±s.d.)               | 32.19±24.78             | -                             | -           |
| Tubulointerstitial lesions                      |                         |                               |             |
| Tubulointerstitial inflammation, -/+ /+++ /++++ | 0/2/7/21                | -                             | -           |
| IFTA score, grade 0/1/2/3                       | 0/3/7/20                | -                             | -           |

**[Abbreviations]** BUN, blood urea nitrogen; DM, diabetes mellitus; DN, diabetic nephropathy; eGFR, estimated glomerular filtration rate; HbA1c, hemoglobin A1c; HC, healthy controls; HDL-C, high-density lipoprotein cholesterol; IFTA, interstitial fibrosis and tubular atrophy; IQR, interquartile range; LDL-C, low-density lipoprotein cholesterol; Scr, serum creatinine; s.d. standard deviation; uACR, urine albumin to creatinine ratio.

**Table S6. Physical and biochemical parameters of experimental animals.**

| Variable                  | <i>Anxal</i> KO                               |             | WT                          |            |
|---------------------------|-----------------------------------------------|-------------|-----------------------------|------------|
|                           | HFD/STZ                                       | SFD         | HFD/STZ                     | SFD        |
| Weight, g                 | 29.87±2.45 <sup>b)</sup>                      | 27.98±1.34  | 26.50±1.90                  | 27.98±0.43 |
| Kidney weight, g          | 0.26±0.03 <sup>a) c)</sup>                    | 0.18±0.02   | 0.24±0.02 <sup>a) c)</sup>  | 0.19±0.01  |
| Kidney/body weight        | 0.86±0.06 <sup>a) c)</sup>                    | 0.66±0.04   | 0.90±0.10 <sup>a) c)</sup>  | 0.67±0.04  |
| Blood glucose, mmol/l     | 25.20±1.83 <sup>a) c)</sup>                   | 8.04±1.87   | 24.52±1.89 <sup>a) c)</sup> | 7.49±1.69  |
| Scr, mg/dl                | 0.089±0.03 <sup>a) c)</sup>                   | 0.026±0.02  | 0.053±0.02                  | 0.028±0.03 |
| BUN, mg/dl                | 30.83±5.31 <sup>a) c)</sup>                   | 21.83±4.07  | 25.50±2.59                  | 21.83±3.67 |
| Total cholesterol, mmol/l | 7.26±1.55 <sup>a) c)</sup>                    | 1.10±0.22   | 7.99±0.55 <sup>a) c)</sup>  | 1.15±0.40  |
| Triglycerides, mmol/l     | 1.12±0.18                                     | 1.04±0.12   | 1.19±0.19 <sup>a)</sup>     | 0.79±0.16  |
| uACR, µg/mg               | 339.95±102.3 <sub>1</sub> <sup>a) b) c)</sup> | 68.32±14.89 | 139.05±38.86 <sub>a)</sub>  | 40.81±6.02 |

**[Abbreviations]** Data are shown as mean±s.d. n = 6 per group. BUN, blood urea nitrogen; HFD/STZ, high-fat diet plus streptozotocin; KO, knockout; Scr, serum creatinine; SFD, standard fat diet; uACR, urine albumin to creatinine ratio; WT, wild type. Data analyses were performed by two-way ANOVA followed by a Tukey's test for four groups.

<sup>a)</sup> ANOVA  $P < 0.05$  versus WT mice +SFD diet.

<sup>b)</sup> ANOVA  $P < 0.05$  versus WT mice +HFD/STZ.

<sup>c)</sup> ANOVA  $P < 0.05$  versus *Anxal* KO mice +SFD diet.



**Table S7. Quantification of mRNA by PCR array.**

|               | HFD/STZ KO group |       |       | HFD/STZ WT group |       |       | SFD KO group |       |       | SFD WT group |       |       |
|---------------|------------------|-------|-------|------------------|-------|-------|--------------|-------|-------|--------------|-------|-------|
|               | 1                | 2     | 3     | 1                | 2     | 3     | 1            | 2     | 3     | 1            | 2     | 3     |
| <b>Actb</b>   | 15.23            | 15.61 | 15.61 | 16.76            | 16.78 | 16.43 | 16.51        | 16.54 | 16.39 | 16.48        | 15.96 | 16.38 |
| <b>Aimp1</b>  | 21.46            | 21.23 | 21.54 | 21.79            | 21.36 | 21.15 | 21.67        | 22.02 | 21.61 | 21.87        | 21.51 | 21.60 |
| <b>Bmp2</b>   | 25.54            | 26.01 | 25.80 | 26.24            | 27.34 | 26.27 | 26.99        | 27.74 | 27.27 | 26.90        | 26.78 | 26.95 |
| <b>Ccl1</b>   | 30.35            | 30.22 | 30.15 | 30.57            | 32.26 | 30.86 | 31.50        | 31.98 | 31.70 | 31.54        | 32.03 | 31.31 |
| <b>Ccl11</b>  | 25.55            | 25.82 | 26.19 | 25.69            | 29.54 | 26.31 | 26.61        | 26.61 | 26.60 | 26.89        | 26.74 | 26.50 |
| <b>Ccl12</b>  | 20.69            | 21.66 | 21.50 | 25.85            | 25.84 | 24.96 | 22.93        | 24.17 | 23.78 | 26.15        | 25.34 | 25.98 |
| <b>Ccl17</b>  | 24.54            | 25.75 | 25.16 | 27.21            | 29.20 | 26.80 | 28.77        | 28.13 | 27.49 | 28.13        | 27.95 | 28.32 |
| <b>Ccl19</b>  | 20.78            | 21.60 | 21.64 | 22.58            | 23.24 | 22.24 | 21.78        | 22.87 | 23.40 | 22.69        | 22.67 | 23.26 |
| <b>Ccl2</b>   | 20.69            | 21.40 | 21.26 | 25.44            | 25.91 | 23.30 | 24.38        | 23.87 | 22.99 | 25.41        | 26.30 | 25.93 |
| <b>Ccl20</b>  | 23.61            | 24.27 | 24.53 | 27.81            | 30.54 | 26.79 | 29.26        | 29.50 | 27.58 | 29.87        | 28.96 | 30.73 |
| <b>Ccl22</b>  | 25.75            | 26.81 | 26.37 | 28.46            | 29.78 | 27.62 | 28.88        | 28.62 | 27.90 | 28.93        | 28.89 | 29.43 |
| <b>Ccl24</b>  | 30.62            | 29.66 | 30.42 | 29.68            | 34.11 | 30.55 | 30.43        | 30.32 | 29.53 | 30.31        | 30.32 | 31.82 |
| <b>Ccl3</b>   | 25.29            | 25.55 | 25.68 | 28.49            | 28.90 | 27.78 | 27.74        | 27.58 | 27.34 | 28.80        | 28.92 | 28.68 |
| <b>Ccl4</b>   | 23.71            | 24.67 | 24.68 | 25.60            | 27.38 | 26.00 | 25.36        | 25.68 | 25.60 | 26.44        | 26.28 | 26.60 |
| <b>Ccl5</b>   | 21.68            | 22.67 | 21.25 | 25.15            | 25.80 | 23.24 | 24.13        | 25.27 | 24.14 | 24.49        | 25.44 | 25.45 |
| <b>Ccl6</b>   | 20.41            | 21.13 | 20.75 | 23.50            | 23.92 | 22.53 | 23.36        | 23.76 | 22.77 | 23.58        | 23.85 | 23.47 |
| <b>Ccl7</b>   | 21.94            | 23.42 | 22.94 | 26.60            | 28.45 | 26.22 | 26.71        | 26.24 | 25.48 | 28.46        | 29.40 | 28.53 |
| <b>Ccl8</b>   | 20.38            | 21.48 | 20.85 | 23.81            | 26.36 | 24.60 | 27.01        | 25.13 | 24.84 | 26.61        | 25.01 | 24.62 |
| <b>Ccl9</b>   | 25.69            | 26.77 | 26.35 | 29.54            | 30.73 | 28.01 | 29.90        | 29.69 | 28.56 | 29.49        | 30.38 | 29.67 |
| <b>Cer1</b>   | 24.38            | 24.77 | 25.22 | 27.21            | 26.52 | 26.51 | 27.35        | 26.92 | 27.50 | 27.47        | 27.63 | 27.57 |
| <b>Cer10</b>  | 27.14            | 27.02 | 27.16 | 27.54            | 27.76 | 27.30 | 27.79        | 27.24 | 27.64 | 27.31        | 27.28 | 27.37 |
| <b>Cer2</b>   | 21.18            | 22.23 | 21.76 | 24.79            | 24.74 | 23.27 | 24.18        | 23.57 | 22.83 | 23.95        | 24.19 | 23.79 |
| <b>Cer3</b>   | 21.55            | 22.40 | 22.25 | 25.79            | 25.74 | 24.52 | 24.63        | 24.52 | 23.88 | 25.37        | 25.16 | 25.41 |
| <b>Cer4</b>   | 27.59            | 28.40 | 28.48 | 29.49            | 29.52 | 28.70 | 29.44        | 29.14 | 28.66 | 29.59        | 29.66 | 29.43 |
| <b>Cer5</b>   | 21.64            | 22.63 | 22.33 | 26.54            | 26.13 | 24.92 | 24.82        | 24.69 | 24.42 | 26.54        | 26.23 | 26.28 |
| <b>Cer6</b>   | 26.32            | 26.91 | 27.41 | 27.39            | 29.50 | 27.53 | 28.34        | 28.48 | 27.77 | 28.39        | 27.52 | 28.47 |
| <b>Cer8</b>   | 28.33            | 30.32 | 29.74 | 32.28            | 32.69 | 29.57 | 32.12        | 35.19 | 30.32 | 32.60        | 30.53 | 30.68 |
| <b>Cd40lg</b> | 27.42            | 28.83 | 28.47 | 29.69            | 32.25 | 28.89 | 29.21        | 30.41 | 29.99 | 29.55        | 29.68 | 30.38 |
| <b>Csf1</b>   | 22.50            | 23.40 | 23.28 | 25.27            | 25.41 | 24.60 | 25.31        | 24.80 | 24.99 | 25.64        | 25.30 | 25.77 |
| <b>Csf2</b>   | 21.22            | 20.25 | 20.44 | 20.19            | 20.66 | 20.58 | 20.83        | 21.01 | 21.24 | 20.48        | 20.35 | 20.34 |
| <b>Csf3</b>   | 29.30            | 28.96 | 29.20 | 29.84            | 30.88 | 30.61 | 29.82        | 30.44 | 30.43 | 30.32        | 30.07 | 30.14 |
| <b>Cx3cl1</b> | 22.26            | 21.62 | 21.45 | 22.36            | 22.26 | 21.75 | 22.57        | 22.70 | 23.28 | 22.74        | 22.30 | 22.57 |
| <b>Cxcl1</b>  | 22.97            | 23.57 | 23.82 | 26.85            | 27.35 | 25.42 | 27.86        | 27.55 | 26.64 | 28.87        | 28.85 | 28.80 |
| <b>Cxcl10</b> | 21.29            | 21.19 | 21.56 | 24.29            | 24.80 | 22.28 | 22.13        | 22.77 | 22.43 | 24.21        | 24.35 | 24.76 |
| <b>Cxcl11</b> | 30.79            | 29.96 | 29.77 | 29.55            | 31.17 | 29.49 | 29.83        | 30.35 | 30.53 | 31.43        | 31.02 | 32.74 |
| <b>Cxcl12</b> | 20.76            | 20.51 | 20.77 | 20.78            | 20.72 | 20.60 | 20.58        | 20.55 | 21.74 | 21.34        | 20.65 | 21.36 |
| <b>Cxcl13</b> | 25.14            | 25.81 | 26.01 | 25.76            | 27.80 | 25.79 | 25.66        | 26.25 | 25.53 | 26.26        | 25.87 | 25.96 |
| <b>Cxcl15</b> | 31.71            | 29.93 | 31.48 | 30.40            | 30.96 | 30.45 | 30.82        | 30.75 | 30.70 | 31.28        | 30.59 | 30.70 |
| <b>Cxcl5</b>  | 21.63            | 22.36 | 22.16 | 28.98            | 30.35 | 26.63 | 29.75        | 31.01 | 28.02 | 30.01        | 30.40 | 30.90 |
| <b>Cxcl9</b>  | 26.66            | 27.73 | 27.57 | 29.88            | 30.42 | 28.80 | 28.00        | 29.96 | 29.61 | 30.39        | 29.72 | 30.27 |
| <b>Cxcr2</b>  | 26.24            | 27.83 | 27.40 | 28.93            | 28.36 | 31.23 | 28.36        | 29.61 | 30.50 | 28.51        | 28.34 | 28.51 |
| <b>Cxcr3</b>  | 24.34            | 24.97 | 25.16 | 26.89            | 27.88 | 25.59 | 26.26        | 26.68 | 25.95 | 27.19        | 26.71 | 26.84 |
| <b>Cxcr5</b>  | 28.22            | 28.98 | 29.49 | 28.99            | 30.22 | 29.63 | 29.54        | 29.85 | 29.45 | 29.74        | 29.85 | 29.61 |
| <b>Fasl</b>   | 26.51            | 26.61 | 27.18 | 28.95            | 28.79 | 27.34 | 27.54        | 28.69 | 27.84 | 28.76        | 29.87 | 29.67 |
| <b>Ifng</b>   | 28.37            | 28.46 | 29.02 | 30.73            | 31.35 | 29.58 | 29.00        | 31.41 | 29.65 | 29.93        | 29.81 | 29.97 |
| <b>Il10ra</b> | 22.71            | 23.70 | 23.28 | 25.46            | 26.00 | 24.50 | 25.45        | 25.46 | 24.77 | 25.81        | 25.64 | 25.95 |
| <b>Il10rb</b> | 20.68            | 20.69 | 20.97 | 21.78            | 21.53 | 21.34 | 21.75        | 21.78 | 21.56 | 21.74        | 21.48 | 21.36 |
| <b>Il11</b>   | 26.26            | 26.79 | 26.76 | 29.17            | 30.35 | 28.37 | 29.40        | 29.71 | 29.26 | 30.34        | 29.73 | 29.75 |
| <b>Il13</b>   | 33.58            | 30.83 | 30.84 | 31.82            | 31.35 | 33.83 | 32.89        | 31.73 | 30.82 | 33.22        | 34.32 | 32.52 |
| <b>Il15</b>   | 23.33            | 22.45 | 22.90 | 22.66            | 22.89 | 22.91 | 22.72        | 23.27 | 22.71 | 23.25        | 23.17 | 22.91 |
| <b>Il16</b>   | 24.23            | 24.84 | 24.74 | 26.27            | 26.35 | 25.60 | 26.74        | 28.48 | 26.46 | 27.13        | 26.61 | 27.15 |

|                  |       |       |       |       |       |       |       |       |       |       |       |       |
|------------------|-------|-------|-------|-------|-------|-------|-------|-------|-------|-------|-------|-------|
| <b>III7a</b>     | 31.57 | 29.99 | 30.38 | 29.63 | 33.46 | 30.70 | 30.86 | 31.30 | 30.57 | 30.87 | 30.99 | 30.83 |
| <b>III7b</b>     | 30.80 | 29.36 | 29.98 | 29.29 | 31.84 | 29.96 | 29.83 | 29.60 | 29.50 | 30.19 | 30.41 | 30.22 |
| <b>III7f</b>     | 24.90 | 23.84 | 24.75 | 23.73 | 25.58 | 24.19 | 23.83 | 24.02 | 23.68 | 24.71 | 24.56 | 24.38 |
| <b>IIIa</b>      | 27.61 | 27.55 | 27.76 | 28.24 | 27.73 | 28.41 | 27.62 | 28.37 | 27.30 | 28.01 | 27.50 | 28.42 |
| <b>IIIb</b>      | 23.38 | 23.83 | 23.81 | 26.62 | 26.64 | 26.46 | 25.75 | 26.63 | 25.99 | 26.17 | 26.17 | 26.13 |
| <b>IIIr1</b>     | 23.28 | 23.70 | 23.69 | 24.83 | 24.96 | 24.44 | 25.32 | 24.95 | 25.32 | 24.88 | 24.70 | 24.87 |
| <b>IIIrn</b>     | 23.64 | 24.44 | 24.40 | 28.41 | 29.49 | 27.72 | 29.75 | 28.18 | 26.77 | 29.64 | 30.21 | 29.28 |
| <b>II21</b>      | 31.40 | 34.27 | 33.02 | 33.84 | 34.69 | 37.01 | 35.90 | 36.98 | 33.81 | 36.27 | 36.45 | 34.42 |
| <b>II27</b>      | 28.26 | 28.65 | 29.32 | 30.22 | 30.12 | 29.94 | 30.39 | 31.21 | 30.74 | 30.61 | 32.25 | 33.59 |
| <b>II2rb</b>     | 24.92 | 25.58 | 25.63 | 27.23 | 27.83 | 25.87 | 27.16 | 27.32 | 27.32 | 28.21 | 27.41 | 27.89 |
| <b>II2rg</b>     | 22.41 | 23.60 | 23.43 | 25.70 | 26.20 | 24.51 | 25.24 | 25.19 | 24.38 | 25.78 | 25.42 | 25.61 |
| <b>II3</b>       | 32.46 | 32.00 | 32.35 | 33.81 | 33.58 | 33.16 | 33.13 | 36.17 | 33.38 | 33.19 | 33.27 | 33.28 |
| <b>II33</b>      | 21.58 | 22.37 | 22.30 | 24.24 | 24.26 | 23.44 | 24.48 | 24.44 | 24.44 | 24.48 | 24.36 | 24.64 |
| <b>II4</b>       | 27.99 | 27.32 | 28.00 | 27.59 | 28.25 | 27.39 | 27.37 | 27.59 | 27.30 | 27.72 | 27.65 | 27.59 |
| <b>II5</b>       | 28.76 | 27.41 | 27.97 | 27.43 | 28.40 | 27.87 | 27.70 | 27.48 | 27.25 | 27.85 | 28.09 | 27.91 |
| <b>II5ra</b>     | 24.78 | 24.90 | 25.19 | 26.59 | 25.70 | 24.48 | 25.39 | 26.18 | 25.49 | 24.79 | 24.72 | 24.39 |
| <b>II6ra</b>     | 24.16 | 24.82 | 24.82 | 25.85 | 26.37 | 25.40 | 26.51 | 26.02 | 26.19 | 26.50 | 26.28 | 26.48 |
| <b>II6st</b>     | 19.44 | 19.24 | 19.55 | 20.33 | 19.98 | 20.16 | 20.33 | 20.34 | 20.36 | 20.86 | 20.36 | 20.44 |
| <b>II7</b>       | 25.89 | 25.50 | 25.63 | 26.58 | 26.32 | 25.99 | 27.16 | 26.69 | 26.54 | 26.88 | 26.23 | 26.48 |
| <b>Lta</b>       | 28.47 | 28.22 | 28.54 | 28.19 | 29.96 | 28.95 | 28.73 | 28.70 | 28.85 | 30.01 | 29.68 | 29.28 |
| <b>Ltb</b>       | 23.95 | 24.54 | 24.27 | 26.31 | 28.28 | 25.72 | 26.55 | 27.46 | 26.44 | 27.52 | 26.72 | 27.16 |
| <b>Mif</b>       | 17.39 | 16.79 | 17.43 | 17.45 | 17.57 | 16.70 | 17.28 | 17.22 | 17.28 | 17.32 | 17.47 | 17.50 |
| <b>Nampt</b>     | 20.15 | 19.44 | 19.78 | 19.75 | 19.72 | 18.94 | 19.92 | 19.97 | 19.84 | 20.17 | 19.63 | 19.86 |
| <b>Osm</b>       | 27.49 | 28.52 | 28.62 | 30.50 | 30.59 | 29.71 | 29.86 | 31.31 | 29.98 | 30.38 | 30.34 | 30.80 |
| <b>Pf4</b>       | 24.46 | 25.39 | 25.33 | 26.45 | 27.45 | 27.20 | 27.21 | 26.97 | 26.25 | 27.96 | 27.30 | 27.40 |
| <b>Spp1</b>      | 11.61 | 11.99 | 12.17 | 15.78 | 15.79 | 14.19 | 15.62 | 15.48 | 14.94 | 15.95 | 15.88 | 15.94 |
| <b>Tnf</b>       | 25.27 | 26.28 | 25.89 | 28.94 | 29.51 | 28.60 | 28.27 | 28.16 | 27.94 | 29.42 | 29.50 | 29.68 |
| <b>Tnfrsf11b</b> | 26.48 | 26.65 | 26.84 | 28.17 | 28.48 | 27.78 | 27.88 | 27.97 | 27.83 | 28.37 | 27.95 | 27.27 |
| <b>Tnfsf10</b>   | 21.90 | 20.78 | 21.45 | 22.13 | 21.50 | 21.65 | 21.86 | 22.00 | 21.57 | 22.62 | 22.16 | 22.39 |
| <b>Tnfsf11</b>   | 26.71 | 25.78 | 26.38 | 25.40 | 27.59 | 26.15 | 26.18 | 26.45 | 26.24 | 26.80 | 26.87 | 26.66 |
| <b>Tnfsf13</b>   | 24.73 | 24.93 | 25.21 | 26.67 | 26.35 | 26.33 | 27.21 | 26.48 | 25.98 | 26.84 | 26.35 | 26.25 |
| <b>Tnfsf13b</b>  | 23.50 | 24.35 | 24.26 | 25.97 | 26.61 | 25.78 | 26.61 | 26.33 | 26.27 | 26.84 | 26.88 | 26.80 |
| <b>Tnfsf4</b>    | 30.59 | 32.87 | 33.46 | 35.47 | N/A   | 36.16 | 32.75 | 35.92 | 36.45 | 33.73 | 37.03 | 33.49 |
| <b>Vegfa</b>     | 20.73 | 20.03 | 20.78 | 20.59 | 20.37 | 20.54 | 20.72 | 20.67 | 20.61 | 20.50 | 20.22 | 20.30 |
